# Supplementary material for: Oxygen vacancies assist a facet effect to modulate the microstructure of TiO2 for efficient photocatalytic O2 activation
Source: Royal Society of Chemistry journal article supplement (doi:10.1039/d2nr05849a), 2022-12-12
Supplement: d2nr05849a1.pdf [file d2nr05849a1.pdf]

## Supporting Information

### **Oxygen vacancies assist facet effect to modulate the microstructure of TiO<sub>2</sub> for efficient photocatalytic O<sub>2</sub> activation**

Xiaojia Ma<sup>a</sup>, Xuejing Tang<sup>a</sup>, Zhenzhong Hu<sup>a</sup>, Mengmeng Zhen<sup>a</sup>, Boxiong Shen<sup>a,\*</sup>,  
Sheng-Qi Guo<sup>a,\*</sup>, Fan Dong<sup>b</sup>

*<sup>a</sup>. Tianjin Key Laboratory of Clean Energy and Pollutant Control, School of Energy and Environmental Engineering, Hebei University of Technology, Tianjin 300401, China*

*<sup>b</sup>. Institute of Fundamental and Frontier Sciences, University of Electronic Science and Technology of China, Chengdu 611731, China*

## Tables and Figures

**Table S1** Average pore size and BET specific surface area of the as-prepared samples.

| Samples             | Pore size (nm) | Specific surface area (m <sup>2</sup> ·g <sup>-1</sup> ) |
|---------------------|----------------|----------------------------------------------------------|
| T101                | 5.56           | 181.58                                                   |
| T001-V <sub>O</sub> | 19.12          | 54.76                                                    |
| T101-V <sub>O</sub> | 5.63           | 155.82                                                   |

**Table S2** Electrochemical impedance spectroscopy (EIS) parameter of the as-prepared samples.

| Samples             | $R_s$ (Ohm) | $R_{ct}$ (Ohm) | CPE  |
|---------------------|-------------|----------------|------|
| T101                | 35.05       | 109830         | 0.97 |
| T001-V <sub>O</sub> | 41.15       | 100030         | 0.93 |
| T101-V <sub>O</sub> | 38.22       | 51028          | 0.93 |

$R_s$  is the series resistance, which represents the resistance generated by the electrolyte solution and circuit components; CPE is the constant phase element of capacitance corresponding to  $R_{ct}$ .

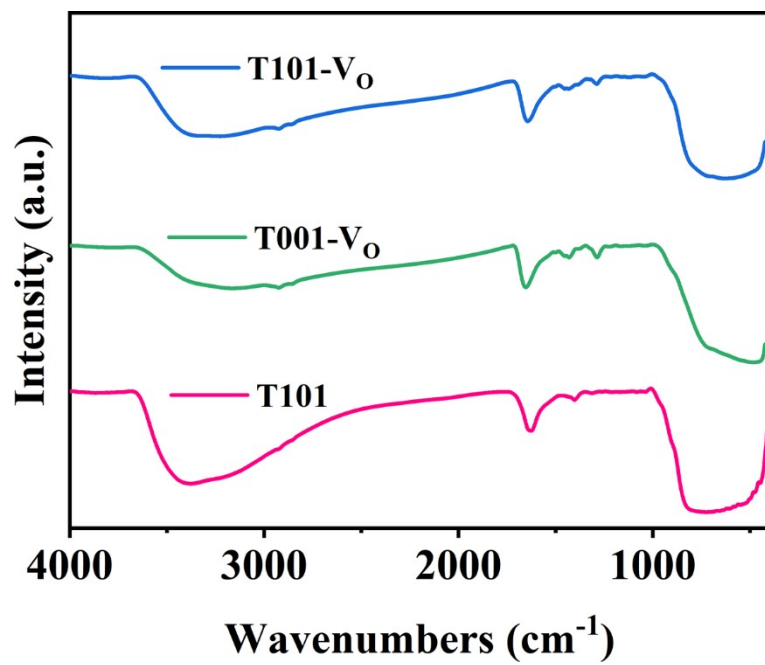

**Fig. S1** FT-IR of the samples.

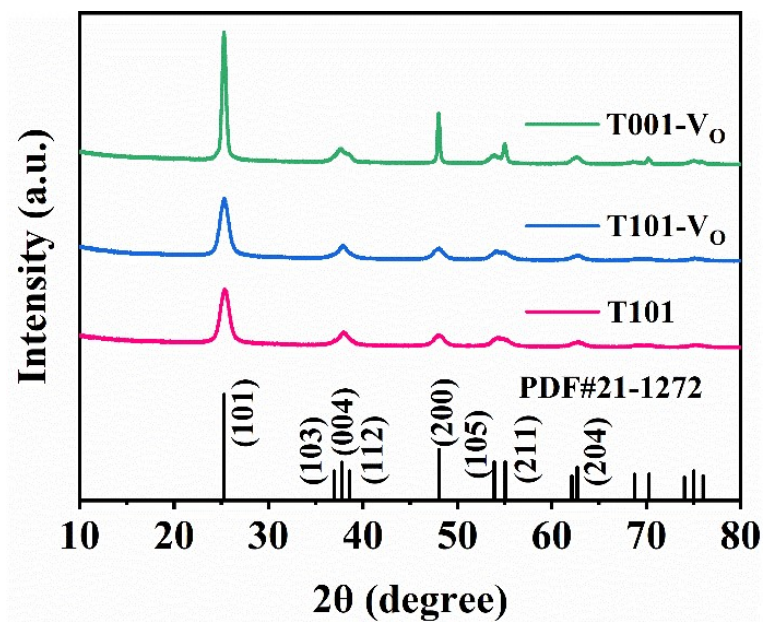

Fig. S2 XRD patterns of the samples.

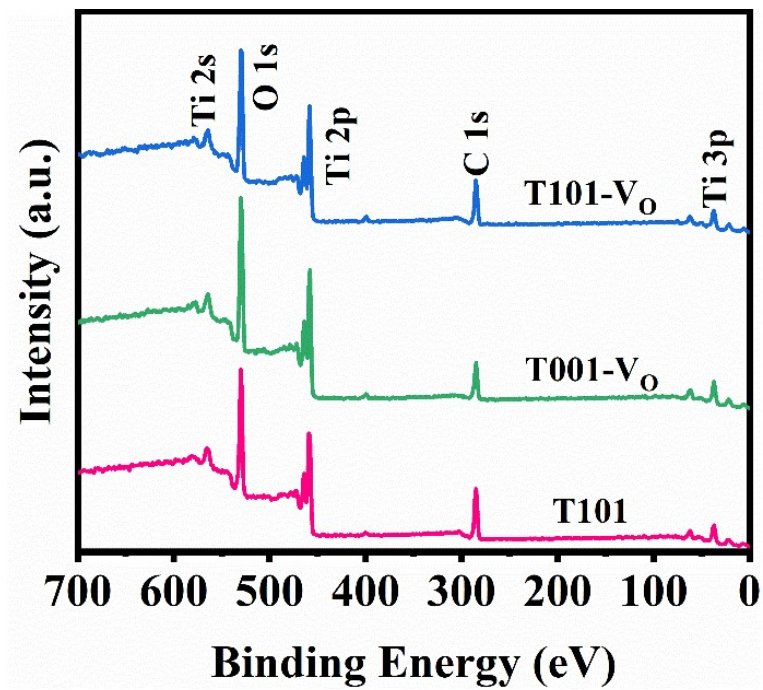

Fig. S3 XPS survey spectra of the samples.

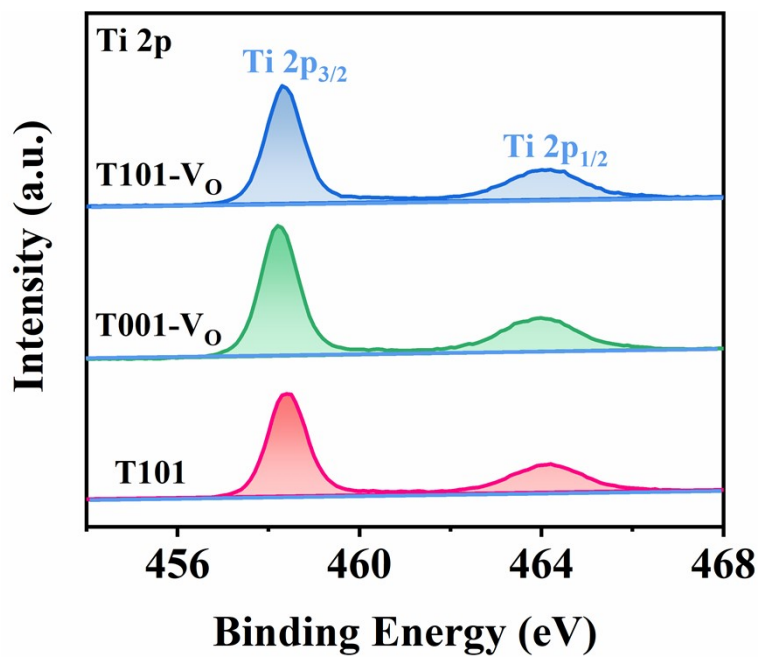

**Fig. S4** The Ti 2p high resolution XPS spectra of the samples.

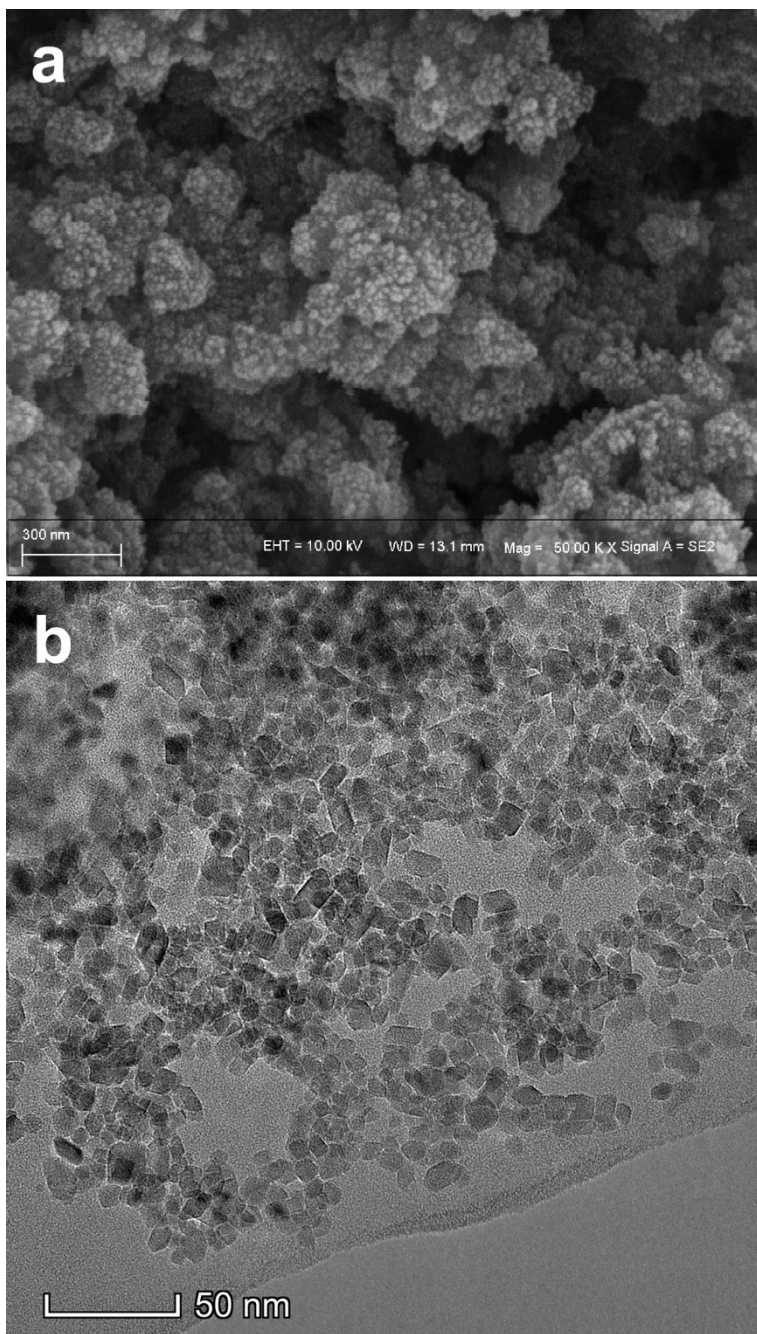

**Fig. S5** (a) SEM image and (b) TEM image of T101.

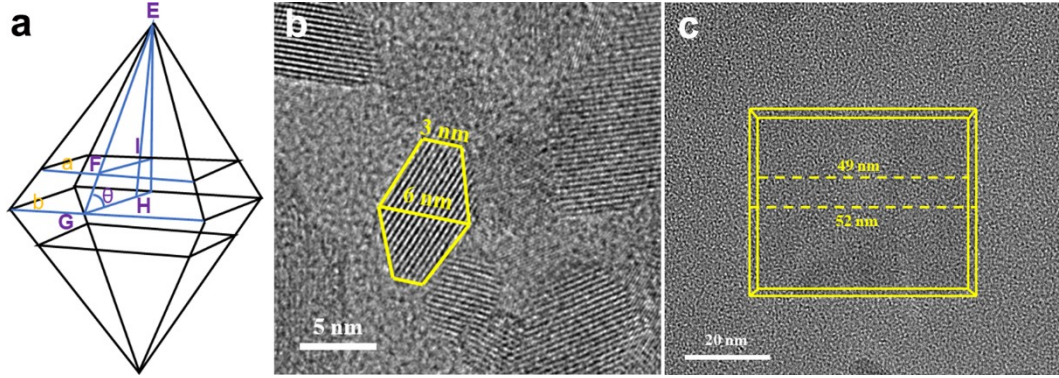

**Fig. S6** (a) TiO<sub>2</sub> geometry configuration; TEM images of (b) T101-V<sub>O</sub> and (c) T001-V<sub>O</sub>.

The percentages of {001} and {101} in the TiO<sub>2</sub> nanocrystals were calculated by following similar methods reported in previous literature.<sup>1,2</sup> Herein,  $\theta$  is the theoretical value (68.3°) for the angle between the {001} and {101} facets of anatase. The length of  $a$  and  $b$  were obtained from the HR-TEM images.

$$\begin{aligned}
 \{001\}\% &= \frac{S_{001}}{S_{001} + S_{101}} \times 100\% \\
 &= \frac{2a^2}{2a^2 + 8\left(\frac{1}{2}EG \times b - \frac{1}{2}EF \times a\right)} \times 100\% \\
 &= \frac{a^2}{a^2 + 4\left(\frac{1}{2} \times \frac{1}{2}b \times \frac{1}{\cos\theta} \times b - \frac{1}{2} \times \frac{1}{2}a \times \frac{1}{\cos\theta} \times a\right)} \times 100\% \\
 &= \frac{\cos\theta}{\cos\theta + \frac{b^2}{a^2} - 1} \times 100\%
 \end{aligned}$$

Results:

T101-V<sub>O</sub>: S<sub>{001}</sub>=11%, S<sub>{101}</sub>=89%; T001-V<sub>O</sub>: S<sub>{001}</sub>=76%, S<sub>{101}</sub>=24%.



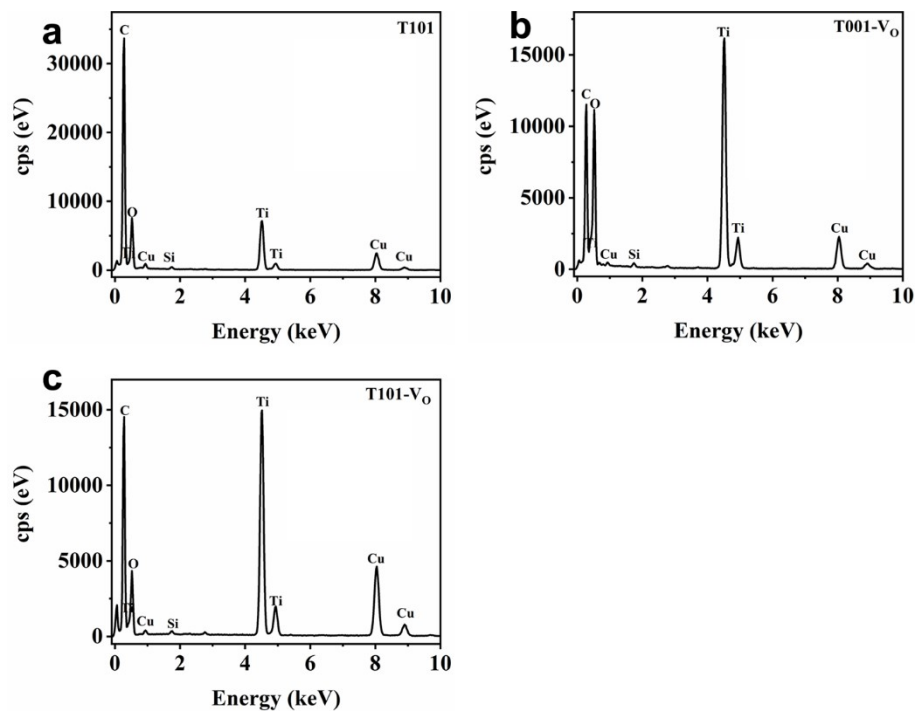

**Fig. S7** TEM-EDS of (a) T101, (b) T001-V<sub>O</sub> and (c) T101-V<sub>O</sub>.

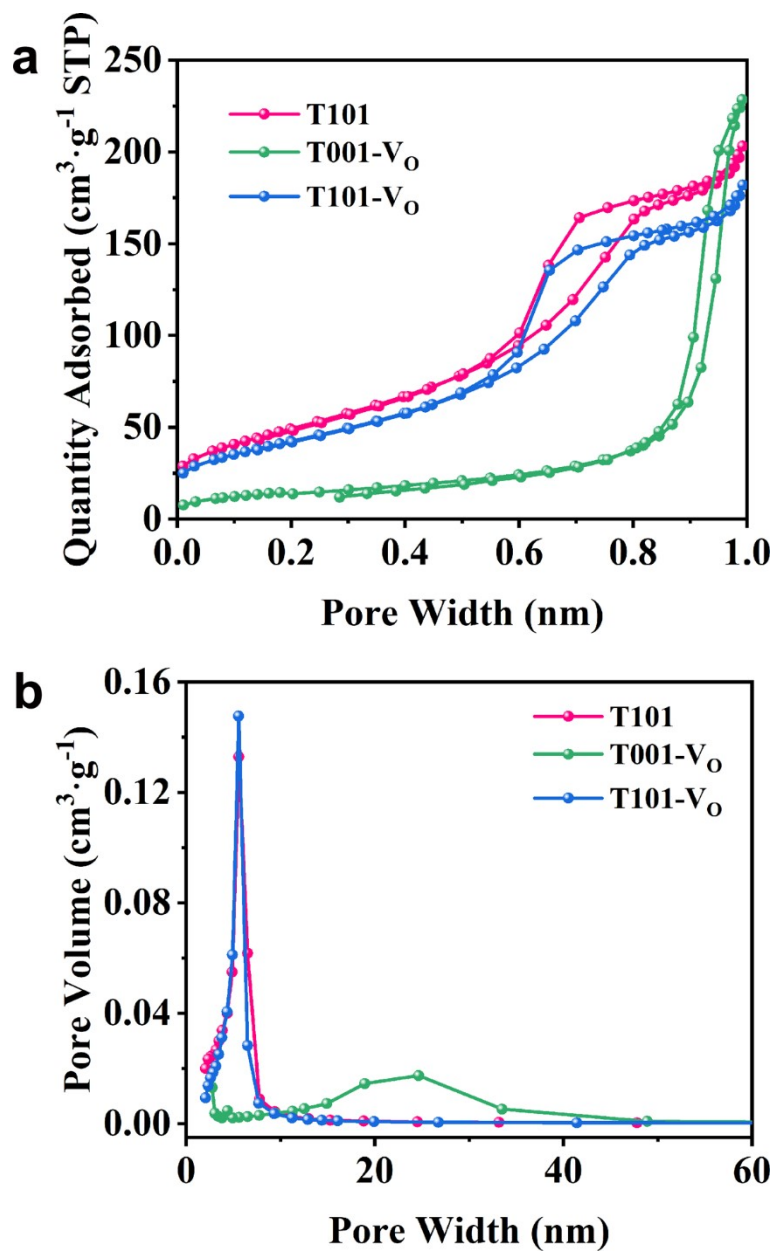

Fig. S8 (a) N<sub>2</sub> adsorption/desorption isotherms and (b) pore width of the samples.

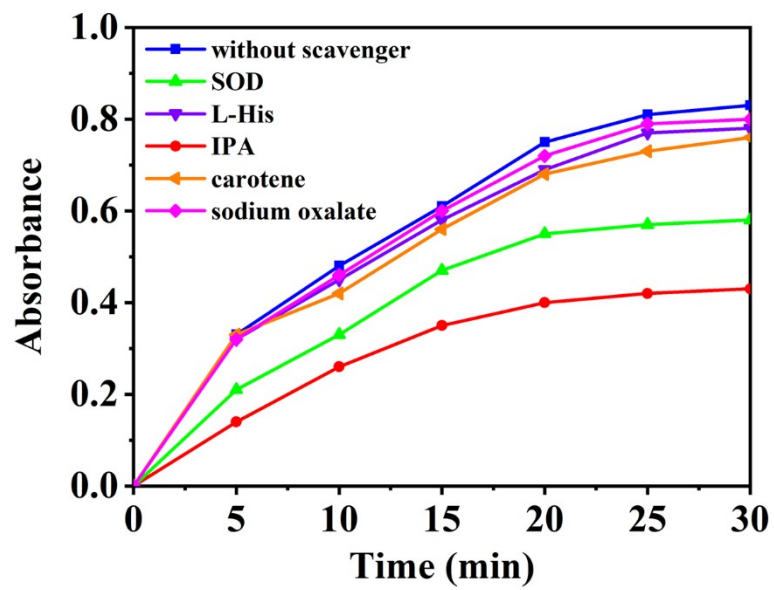

**Fig. S9** Absorbance change over T101-V<sub>O</sub> with different scavengers of TMB oxidation.

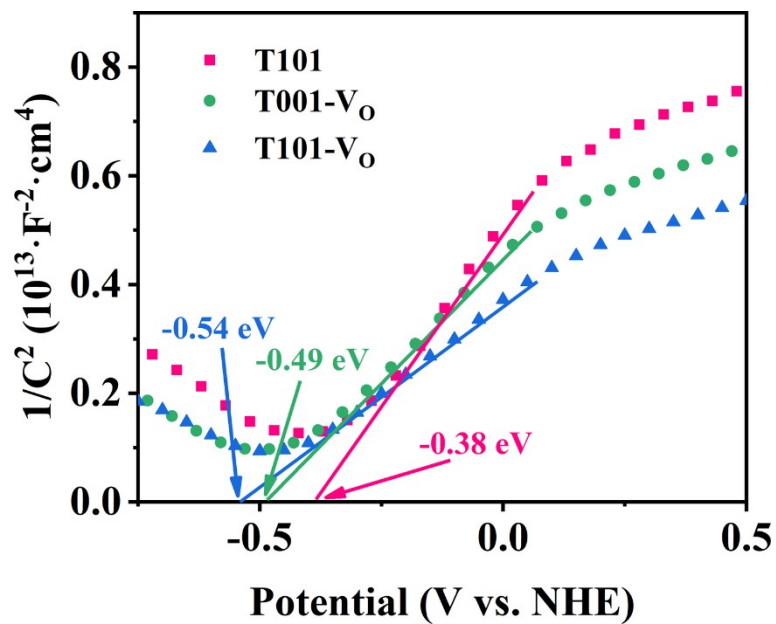

Fig. S10 Mott-Schottky plots of the samples.

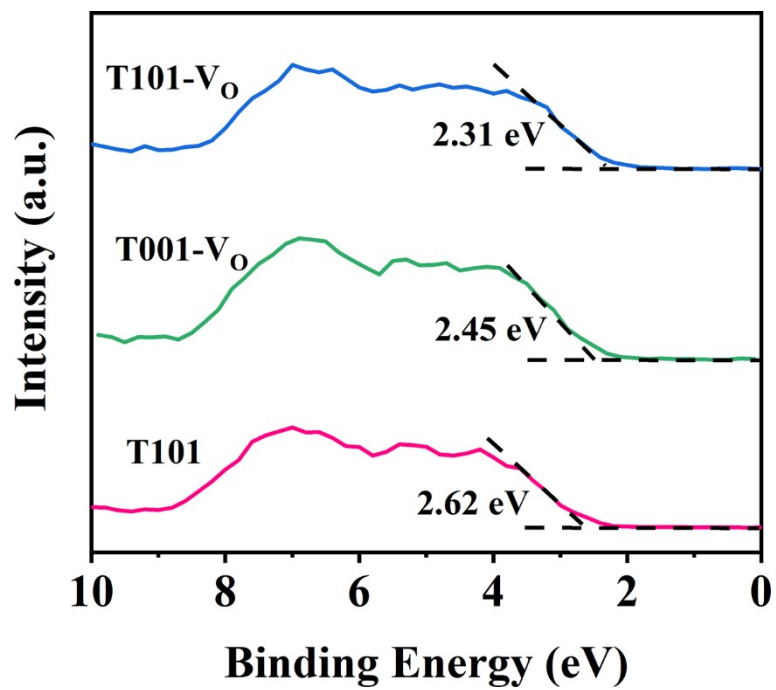

Fig. S11 Valence band of the samples.

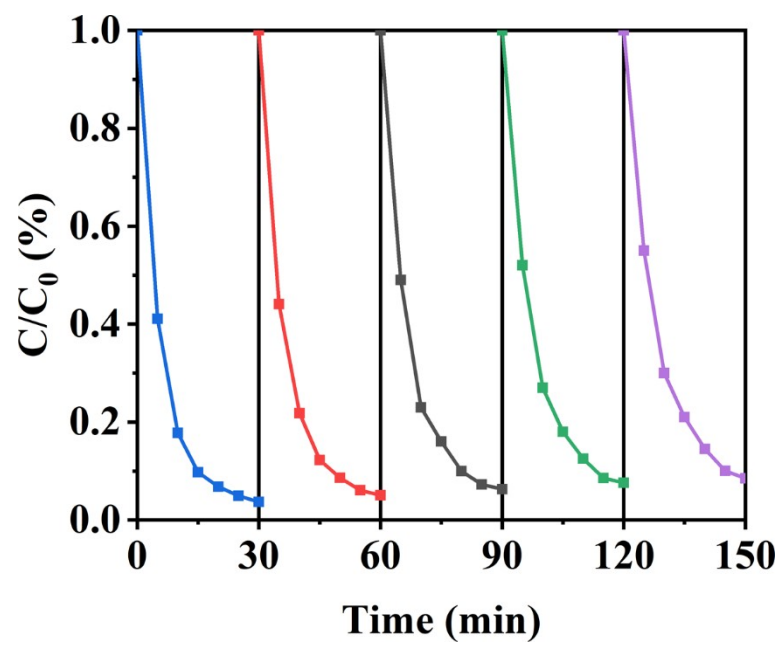

Fig. S12 Cyclic photocatalytic reaction of T101-V<sub>O</sub>.

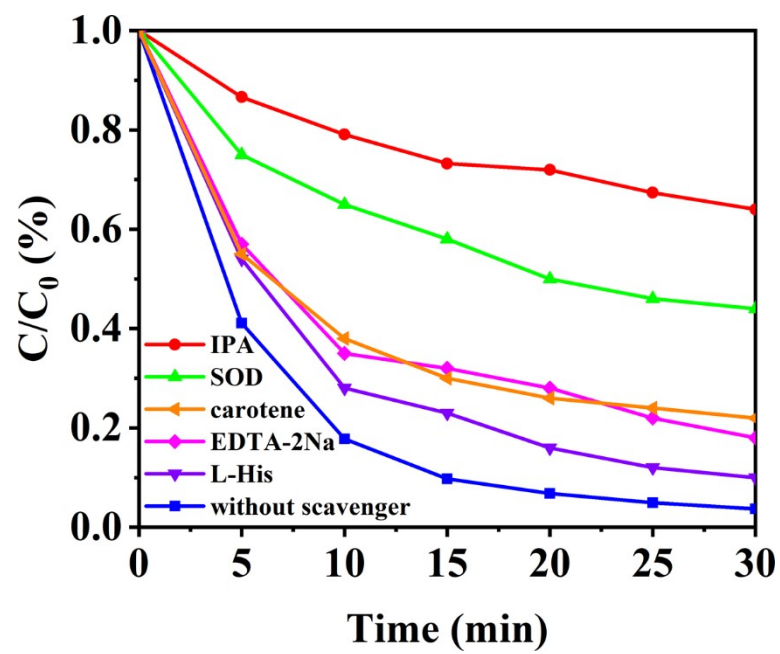

Fig. S13 Photodegradation of RhB by T101-V<sub>O</sub> under different conditions.

## References

- 1 J. Yu, J. Low, W. Xiao, P. Zhou and M. Jaroniec, *J. Am. Chem. Soc.*, 2014, **136**, 8839-8842.
- 2 L. Liu, Y. Jiang, H. Zhao, J. Chen, J. Cheng, K. Yang and Y. Li, *ACS Catal.*, 2016, **6**, 1097-1108.
